# Supplementary material for: Electrospun High-Thermal-Resistant Inorganic Composite Nonwoven as Lithium-Ion Battery Separator
Source: Hindawi journal article supplement (doi:10.1155/2020/3879040), 2020-01-23
Supplement: f1 [file 3879040.f1.docx]

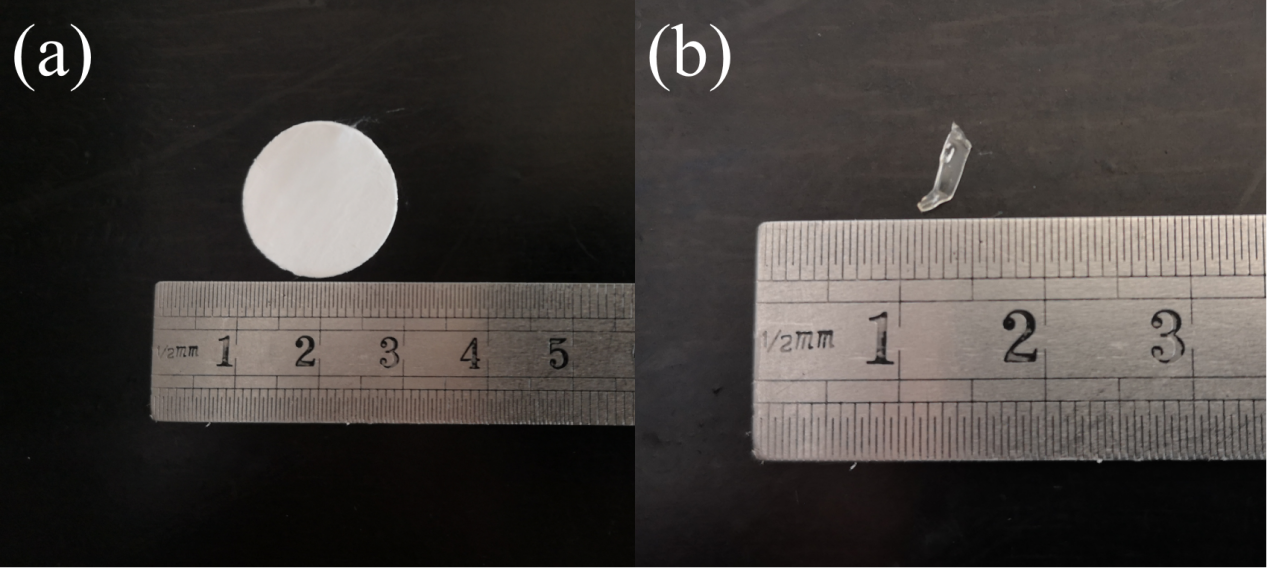


**Fig. S1** (a) Normal temperature photographs of PVDF-HFP, (b) photographs of PVDF-HFP after heat treatment at 200 °C for 20 min.

As shown in Fig. S1, the dimensional change of PVDF-HFP was dramatical and the PVDF-HFP separator had melted and shrunk by more than 90%.
